# Supplementary material for: The Dynamic Changes in the Main Substances in Codonopsis pilosula Root Provide Insights into the Carbon Flux between Primary and Secondary Metabolism during Different Growth Stages
Source: MDPI journal article supplement (doi:10.3390/metabo13030456), 2023-03-21
Supplement: s1 [file s1]

**Table S1.** Primer sequence used in this study for qRT-PCR

| Gene     | Primers                                                   |
|----------|-----------------------------------------------------------|
| CpGAPDH  | F: TGCTTCGTTCAACATCATTC<br>R: CATAACTGGCTGCCTTCTCC        |
| CpPMK    | F: TGCCGTAGTTGCTGCTTTACTT<br>R: TTCGTGGCTGTTTCTTGGTG      |
| CpMVD    | F: CAAGATGCTGGCGTTCAGG<br>R: CCTTTGGTTTTCTGCGTTGG         |
| CpMVK    | F: GACACAAAAGTTGGGAGGAACAC<br>R: GGTAGCCAGTTCATTGCTGATAGA |
| CpUGPase | F: TTTACCCTTGAGAACGACG<br>R: TCTGATGGCTATGTGACCC          |
| CpUGE    | F: CGGGGTACATCTGTGCTTG<br>R: ATGCCATACTTTGCCTTCC          |
| CpUGDH   | F: GATGCTTATGAGGCGACGAA<br>R: GAGGCTTACCAATGGAGTAGACAAT   |

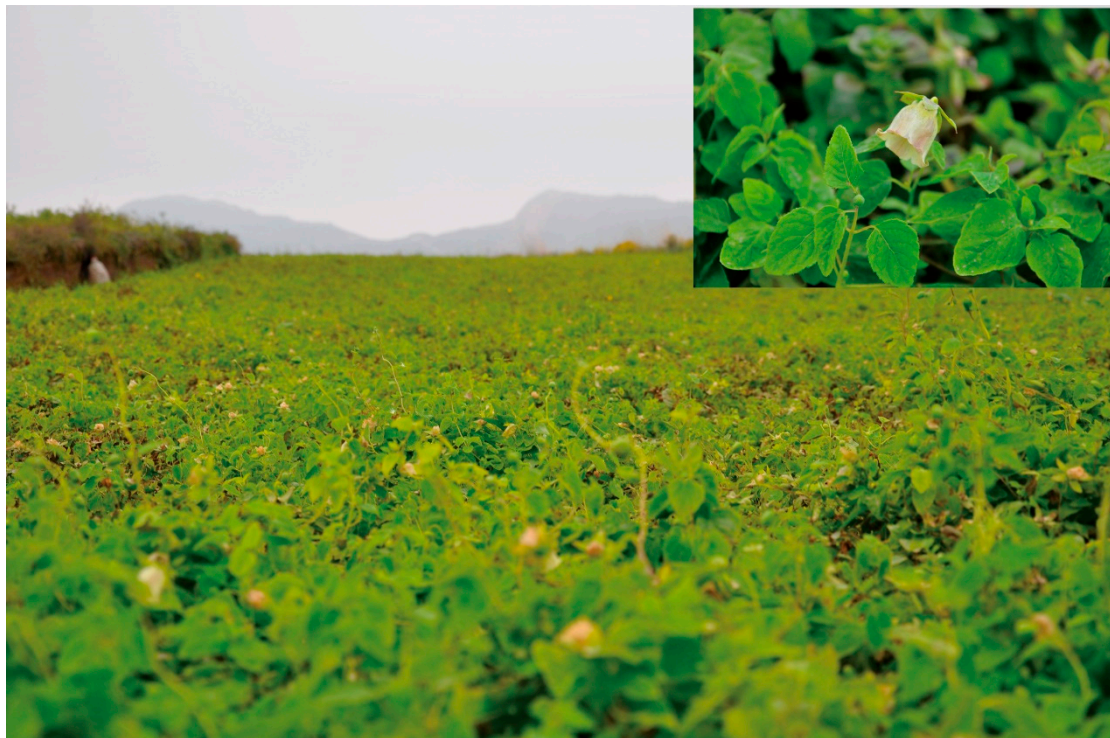

**Figure S1.** *Codonopsis pilosula* in the field.

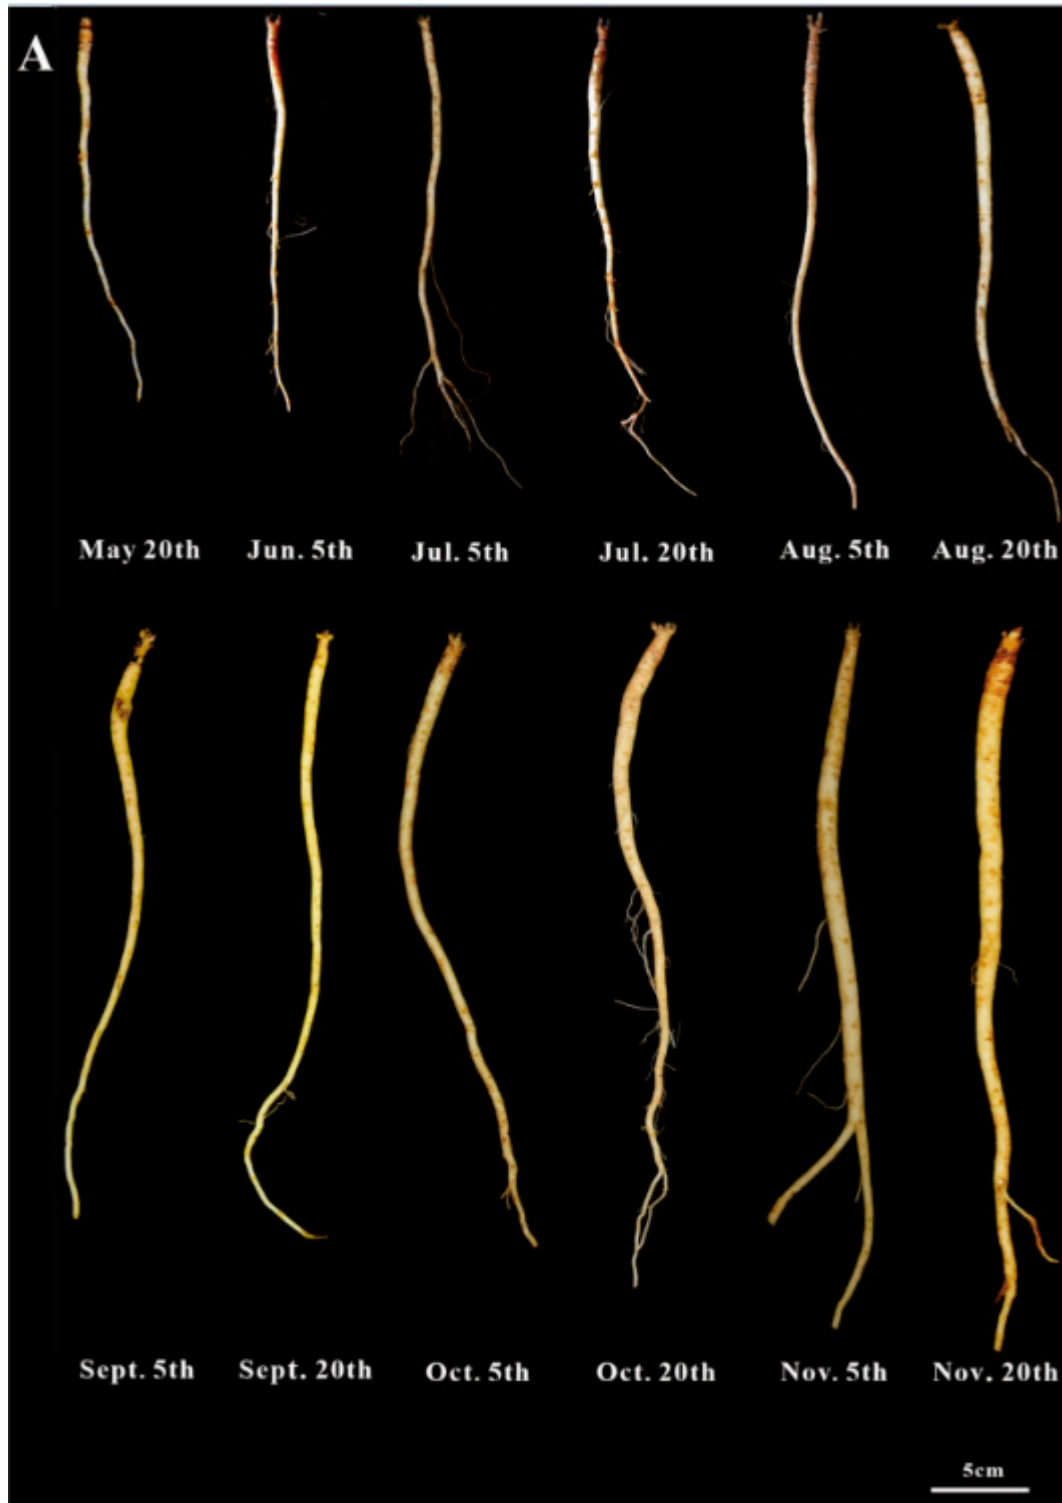

**Figure S2.** Root samples of *Codonopsis pilosula* at different developmental stages (scale bar, 5 cm)

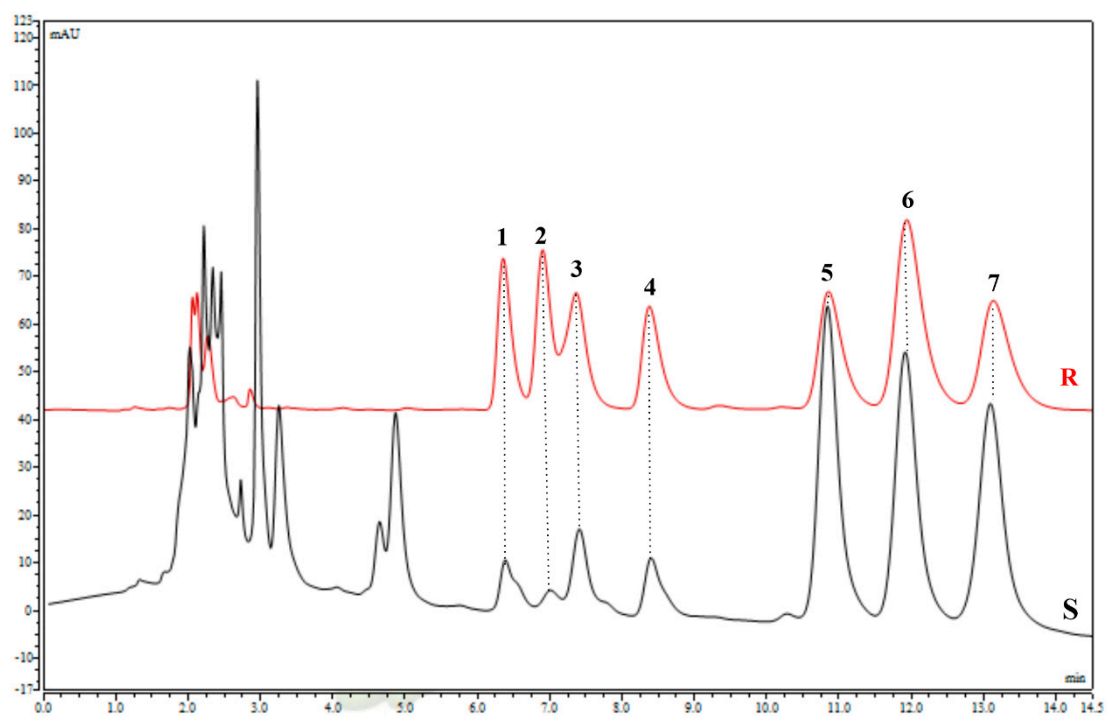

**Figure S3.** HPLC profiles of monosaccharide composition. Ms: Mixed standards; S: Sample; 1, D-mannose; 2, rhamnose; 3, D-glucuronic acid; 4, D-galacturonic acid; 5, glucose; 6, ga-lactose; 7, arabinose.
